# Supplementary material for: Advancing insights on the anti-obesity biochemical mechanism of (−)-epigallocatechin gallate (EGCG) by inhibiting α-amylase activity
Source: Royal Society of Chemistry journal article supplement (doi:10.1039/c6ra20750b), 2016-01-01
Supplement: c6ra20750b1.pdf [file c6ra20750b1.pdf]

## Supporting Information

**Table S1** *In vitro* amylase inhibition effect of EGCG in comparison with some other phenolics in the literature

| Phenolics    | IC <sub>50</sub> (μM) | Ref.        |
|--------------|-----------------------|-------------|
| Acarbose     | 23.2                  | 19          |
| Tannic acid  | 140                   | 19          |
| Luteolin     | 170                   | 19          |
| EGCG         | 0.076                 | In our work |
| EGCG         | 0.024                 | 18          |
| Ferulic acid | ≥5000                 | 19          |

**Table S2** Changes of body weight, length and Lee's index after 30 days feeding of a obese mice supplemented with 50 mg EGCG /kg-mouse

| Group          | Body weight (mg) | Body length (cm) | Lee's Index |
|----------------|------------------|------------------|-------------|
| Normal control | 4.90±1.11        | 0.77±0.28        | 0.27±0.13   |
| Obese          | 12.92±1.10**     | 0.47±0.22        | 0.82±0.11*  |
| EGCG-treated   | 8.02±1.00*       | 0.36±0.22        | 0.51±0.07*  |

\* < 0.05; \*\* < 0.001 (analysis of variance).

**Table S3** Change of TC, TG, HDL-C, FFA and glucose levels after 30 days feeding of a obese mice supplemented with 50 mg EGCG /kg-mouse

| Group          | TC<br>(mg/mL) | TG<br>(mg/mL) | HDL-C<br>(mg/mL) | FFA<br>(mg/mL) | Glucose<br>(mg/mL) |
|----------------|---------------|---------------|------------------|----------------|--------------------|
| Normal control | 2.74±0.29     | 0.85±0.09     | 1.82±0.48        | 203.12±96.46   | 10.38±1.18         |
| Obese          | 4.21±0.47**   | 0.88±0.12     | 1.49±0.15        | 223.14±107.65  | 14.62±2.16         |
| EGCG-treated   | 3.60±0.22*    | 0.83±0.13     | 2.02±0.49        | 117.02±60.69   | 12.59±1.78         |

\*\* < 0.001; \* < 0.05; analysis of variance

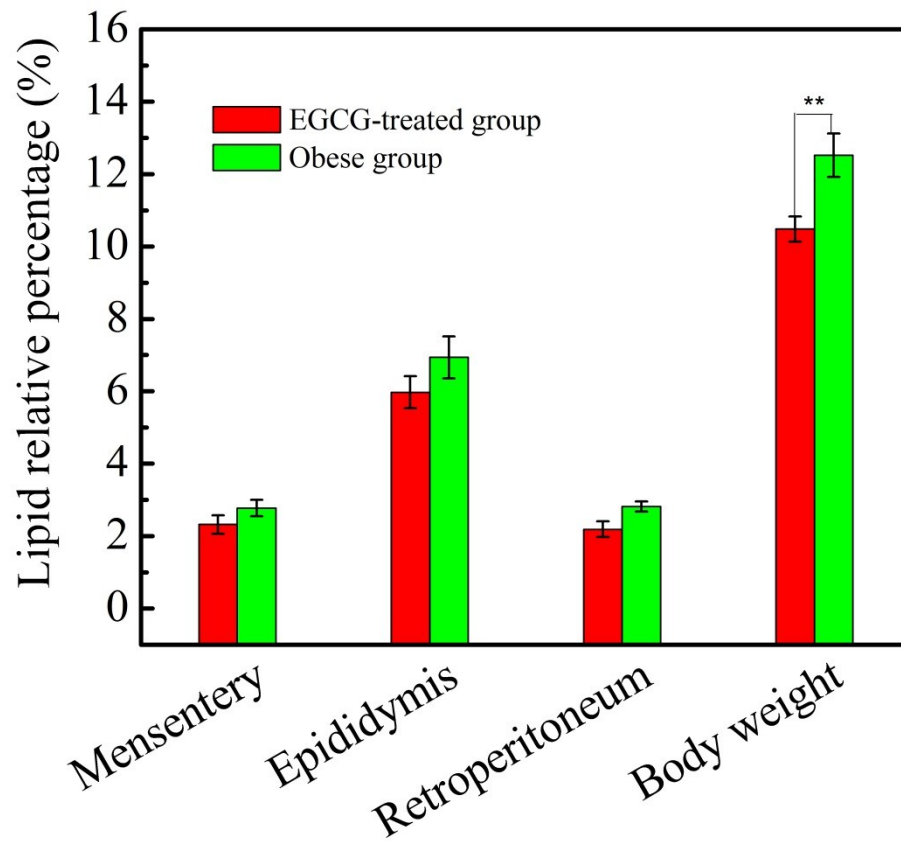

**Fig.S1** The lipid relative percentage in organs and total body weight of obese mice after 30 days EGCG 50 mg/kg-mouse supplementation (\*\* p<0.05)

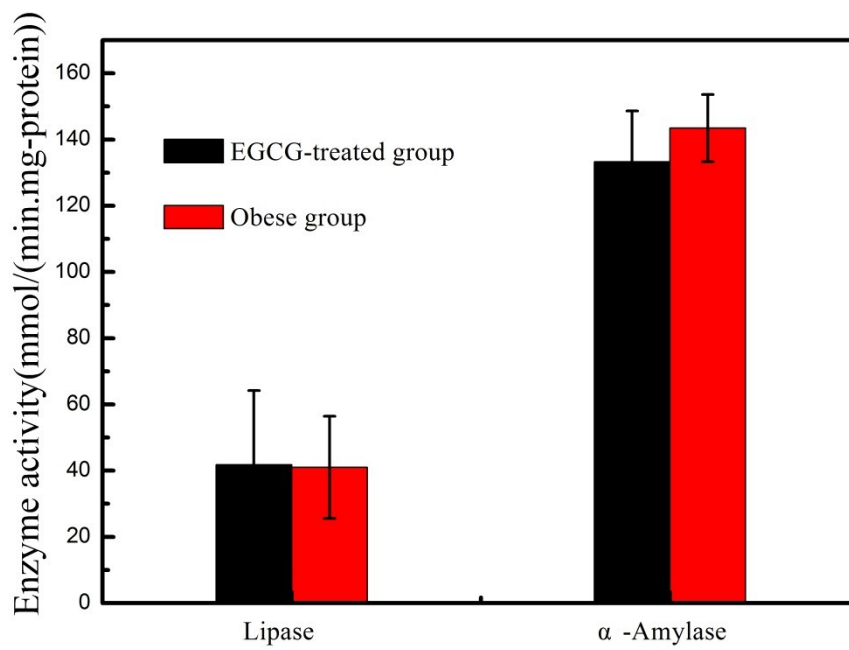

**Fig.S2** Enzyme activity of lipase and amylase in serum of obese mice after 30 days EGCG 50 mg/kg-mouse supplementation.
